# Supplementary material
Source: publisher figshare collection journal article supplement (https://tandf.figshare.com/ndownloader/files/21807867)
Supplement: Supplementary file 1 [file 21807867]

**FIGURE S1. Trypsin doesn’t affect PDCoV pseudovirus release.** Release of PDCoV from **(A)** LLC-PK were analyzed with an MOI of 0.5 and **(B)** ST cells were analyzed with an MOI of 5 in the presence or absence of trypsin (5 μg/ml). The supernatant and the cell pellets were collected at 12 and 24 hpi, and expression of viral N protein in both the supernatant and cell lysate was analyzed by western blot.
